# Supplementary material for: lncRNA PAPAS tethered to the rDNA enhancer recruits hypophosphorylated CHD4/NuRD to repress rRNA synthesis at elevated temperatures
Source: PubMed Central journal article supplement — Genes Dev. 2018 Jun 1;32(11-12):836–48. doi: 10.1101/gad.311688.118 (PMC6049515; doi:10.1101/gad.311688.118), 2018-06-01
Supplement: supp_gad.311688.118_Supplemental_Figures_and_Legends.pdf [file supp_gad.311688.118_Supplemental_Figures_and_Legends.pdf]

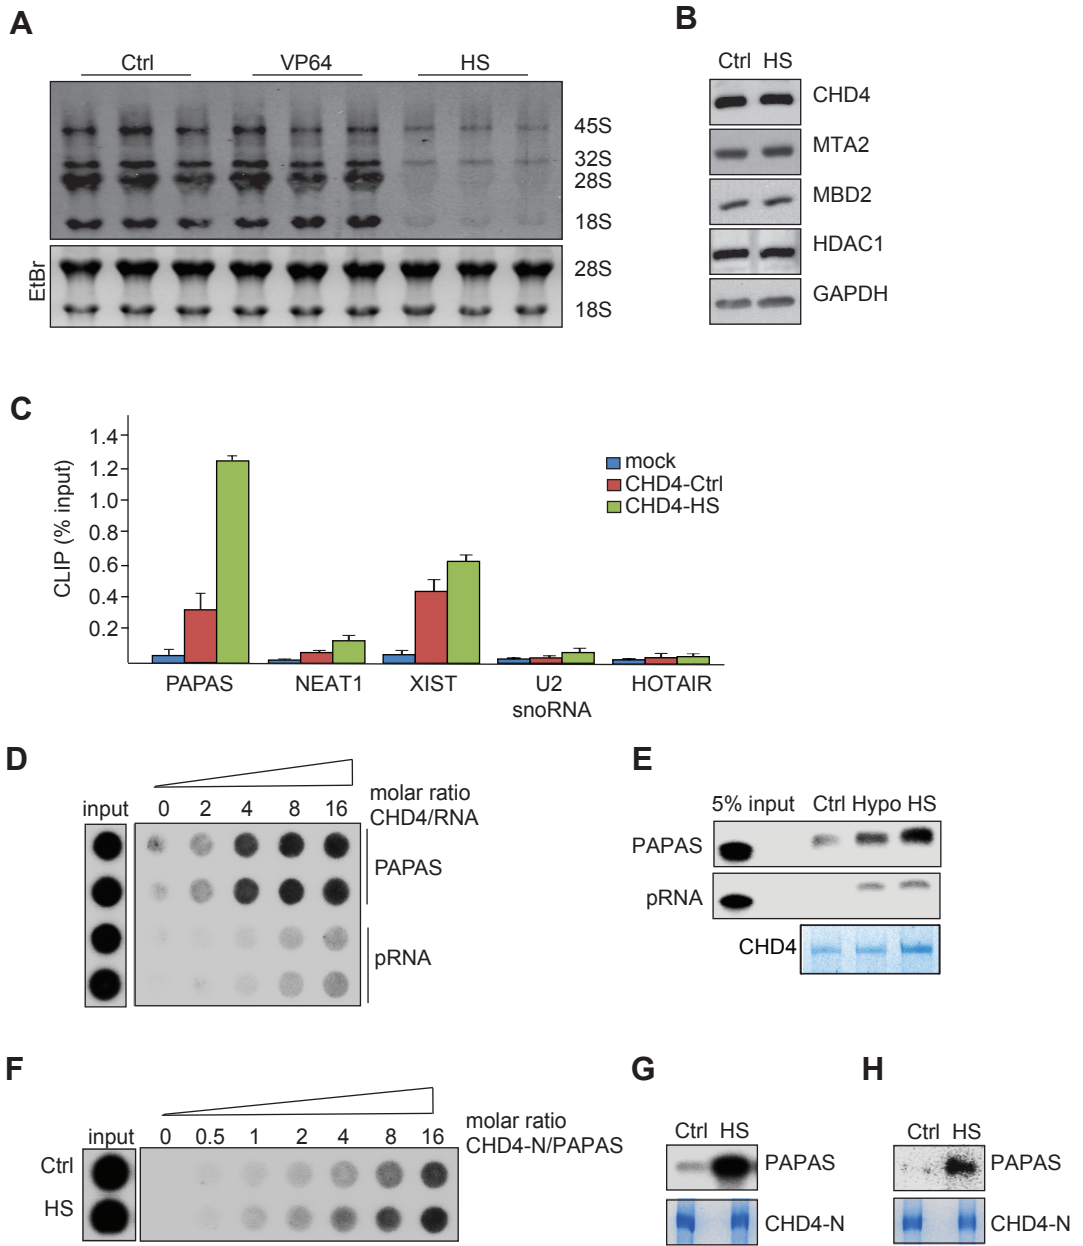

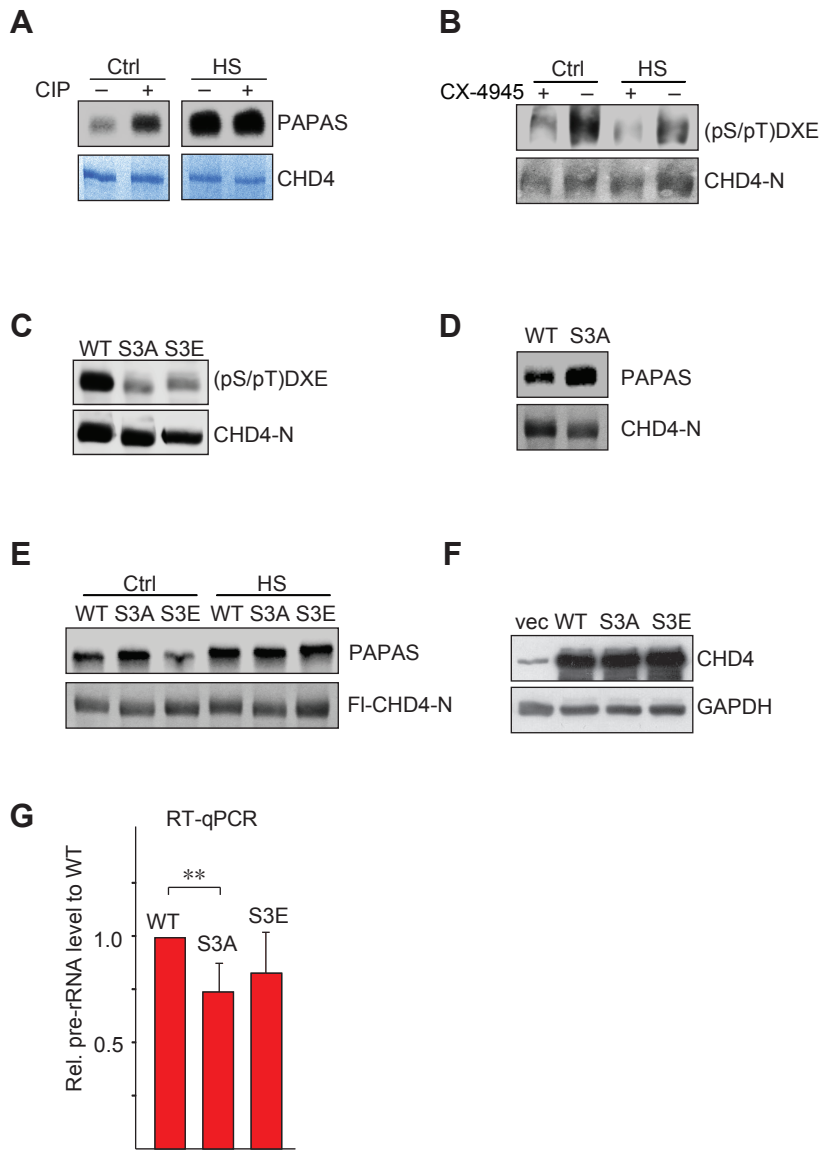

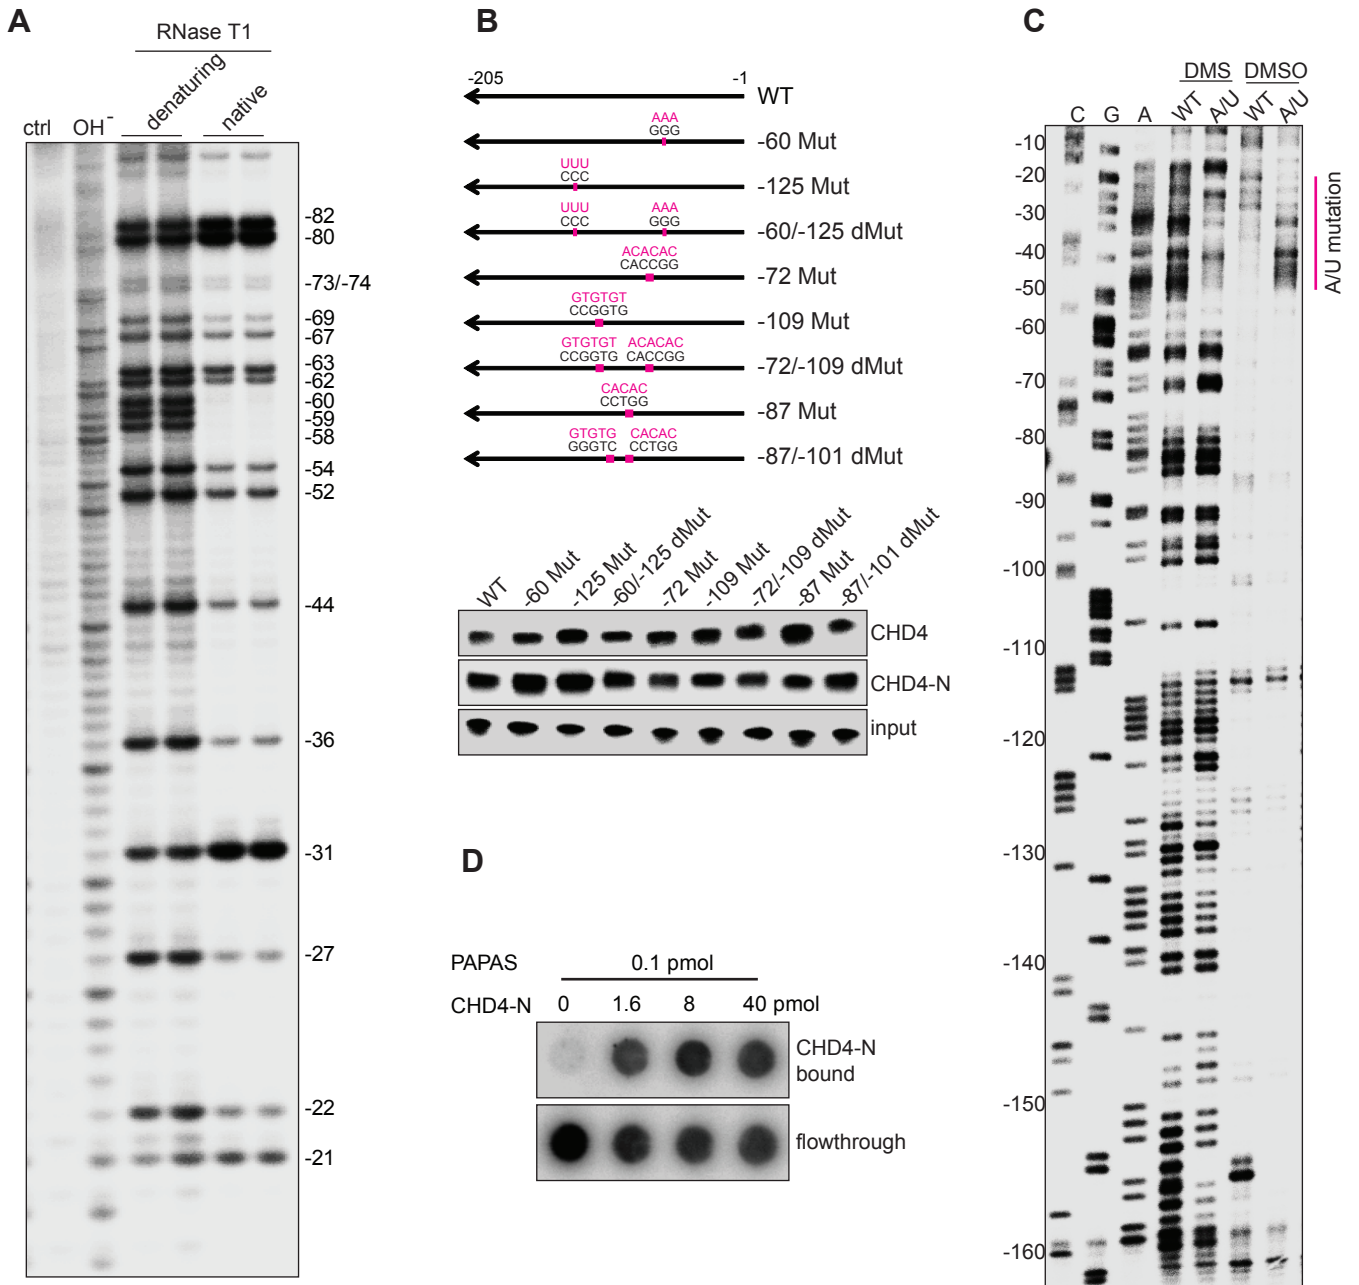

**A**

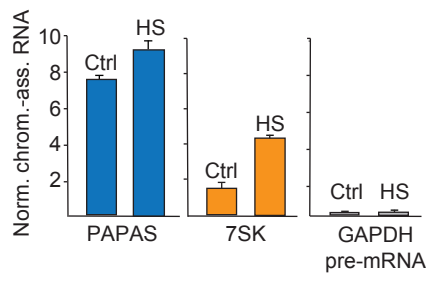

## Supplemental Figures

### Supplemental Fig. S1.

- (A) Pre-rRNA synthesis in metabolically labeled control, heat-shocked and dCas9-VP64 transfected cells. NIH3T3 cells were labeled for 2 h with  $^3\text{H}$ -uridine and pre-rRNA was visualized by gel electrophoresis and fluorography.
- (B) Western blot showing the levels of CHD4, MTA2, MBD2, HDAC1 and GAPDH in untreated or heat-shocked cells.
- (C) CLIP assay monitoring the interaction of Fl-CHD4 with different control RNAs in untreated or heat-shocked HEK293 cells. Data were normalized to input (n=3).
- (D) Filter binding assay monitoring the interaction of 100 pmoles of radiolabeled PAPAS or pRNA with serial dilutions of Fl-CHD4 purified from heat-shocked HEK293T cells. Membrane-bound CHD4/PAPAS was monitored by PhosphorImaging.
- (E) Pull-down assay showing the interaction of radiolabeled PAPAS or pRNA with Fl-CHD4 purified from untreated, hypotonic stress and heat-shocked cells. The Coomassie brilliant blue stain shows the amounts of bead-bound Fl-CHD4.
- (F) Filter binding assay monitoring the interaction of 100 pmoles of radiolabeled PAPAS with serial dilutions of Fl-CHD4-N purified from untreated or heat-shocked cells. Membrane-bound CHD4/PAPAS complexes were monitored by PhosphorImaging.
- (G) Pull-down assay showing the interaction of radiolabeled PAPAS with Fl-CHD4-N purified from untreated or heat-shocked cells.
- (H) Northwestern blot showing binding of radiolabeled PAPAS (-1/-205) to Fl-CHD4-N purified from untreated or heat-shocked cells. Bound RNA was detected by PhosphorImaging.

### Supplemental Fig. S2.

- (A) Pull-down assay showing the interaction of radiolabeled PAPAS with CIP-treated Fl-CHD4 purified from untreated or heat-shocked cells.
- (B) Western blot with an anti-phospho-CK2 antibody showing decreased phosphorylation of CHD4-N in heat-shocked HEK293T cells exposed to CX-4945 (5  $\mu\text{M}$ , 24 h).
- (C) Western blot with anti-phospho-CK2 substrate antibody showing reduced phosphorylation of Fl-CHD4-N/S3A and Fl-CHD4-N/S2E.

- (D) Northwestern blot showing PAPAS binding to Fl-CHD4-N/WT and Fl-CHD4/S3A. The Ponceau stain below shows the amount of bound Fl-CHD4-N and Fl-CHD4-C.
- (E) Pull-down experiment showing binding of PAPAS to Fl-CHD4-N/WT, Fl-CHD4/S3A and Fl-CHD4/S3E isolated from untreated or heat-shocked cells.
- (F) Western blot showing the levels of overexpressed wildtype and mutant CHD4.
- (G) RT-qPCR of pre-rRNA in HEK293T cells expressing Fl-CHD4-N/WT, Fl-CHD4-N/S3A and Fl-CHD4-N/S3E. Data are normalized to WT (n=3).

Bars represent mean values  $\pm$  SD.

### **Supplemental Fig. S3.**

- (A) RNase T1 digestion profile of native and denatured PAPAS (-1/-205)
- (B) Pull-down assay monitoring binding of Fl-CHD4 or Fl-CHD4-N to radiolabeled wildtype and mutant PAPAS (**Supplemental Table S2**). Mutated sequences are marked in red.
- (C) DMS/SHAPE-RT probing comparing the secondary structure of PAPAS-WT and PAPAS-A/U.
- (D) Filter binding assay monitoring binding of radiolabeled PAPAS (-1/-205) to Fl-CHD4-N.

### **Supplemental Fig. S4.**

- (A) RT-qPCR comparing the levels of chromatin-bound PAPAS (-36/-135), 7SK and GAPDH pre-mRNA from control (Ctrl) and heat-shocked (HS) NIH3T3 cells. Values are normalized to the respective cellular RNA values (n=3).

Data are presented as mean  $\pm$  SEM.
