# Supplementary material for: lncRNA PAPAS tethered to the rDNA enhancer recruits hypophosphorylated CHD4/NuRD to repress rRNA synthesis at elevated temperatures
Source: PubMed Central journal article supplement — Genes Dev. 2018 Jun 1;32(11-12):836–48. doi: 10.1101/gad.311688.118 (PMC6049515; doi:10.1101/gad.311688.118), 2018-06-01
Supplement: supp_gad.311688.118_Supplemental_table_S1_S2.pdf [file supp_gad.311688.118_Supplemental_table_S1_S2.pdf]

## Supplemental Tables

**Supplemental Table S1. List of oligonucleotides and synthetic RNAs used in this study**

| Oligonucleotide           | Sequence (5'-3')                                  | Application                     |
|---------------------------|---------------------------------------------------|---------------------------------|
| mrDNA (-21/-1), rev       | ACCTATCTCCAGGTCCAATAG                             | ChIP                            |
| mrDNA (-21/-1)/T7, rev    | TAATACGACTCACTATAGGGAGGG<br>ACCTATCTCCAGGTCCAATAG | In vitro synthesis of PAPAS RNA |
| mrDNA (-56/-36), rev      | GATCACAAGCATAAAAGAGAC                             | qPCR, RT-qPCR                   |
| mrDNA (-135/-117), for    | TTCGTTATGGGGTCATTTT                               | qPCR, RT-qPCR                   |
| mrDNA (-160/-140), for    | GTTGTTCTTTGAGGTCCGG                               | ChIP                            |
| T7/mrDNA (-205/-183), for | TAATACGACTCACTATAGGGAGGG<br>ACCTGTCGGTCTTATCAGTTC | cDNA synthesis of mouse PAPAS   |
| mrDNA (-205/-183), for    | GACCTGTCGGTCTTATCAGTTC                            | RT-qPCR                         |
| mrDNA (-239/-221), rev    | CCCATAGCTTCCCTCGGC                                | qPCR                            |
| mrDNA (-252/-234), rev    | CTCGGCCTCAGACGTACAG                               | RT-qPCR                         |
| mrDNA (-333/-315), for    | CGGTCAGCTGGAGCTTTGG                               | RT-qPCR                         |
| mrDNA (-355/-337), for    | GGCTTCCAGGCCGATGTG                                | cDNA synthesis of mouse PAPAS   |
| mrDNA (-365/-347), for    | ATTATGGGCCCGGCTTCCA                               | qPCR                            |
| sgRNA1, for               | CACCGCAAAGTGTGCCCCGAGTAC                          | CRISPR activation               |
| sgRNA1, rev               | AAACGTACTCCGGGCGACACTTTGC                         | CRISPR activation               |
| sgRNA2, for               | CACCGCGGACAACCTGGTCGACCTAA                        | CRISPR activation               |
| sgRNA2, rev               | AAACTTAGGTGCGACCAGTTGTCCGC                        | CRISPR activation               |
| sgRNA3, for               | CACCGGTACTGGTCGACCTATATGA                         | CRISPR activation               |
| sgRNA3, rev               | AAACTCATATAGGTGCGACCAGTACC                        | CRISPR activation               |

|                           |                                                  |                                                        |
|---------------------------|--------------------------------------------------|--------------------------------------------------------|
| T7/hrDNA (-49/-30), for   | TAATACGACTCACTATAGGGAGGG<br>GTATATCTTTTCGCTCCGAG | cDNA synthesis of human PAPAS                          |
| hrDNA (-49/-30), for (H0) | GGTATATCTTTTCGCTCCGAG                            | ChIP, RT-qPCR                                          |
| hrDNA (+13/+32), rev (H0) | GACGACAGGTCGCCAGAGGA                             | ChIP, RT-qPCR                                          |
| h pre-rRNA for            | TGTCAGGCGTTCTCGTCTC                              | RT-qPCR                                                |
| h pre-rRNA rev            | AGCACGACGTCACCACATC                              | RT-qPCR                                                |
| 18S rRNA, for             | CGCCGCTAGAGGTGAAATTCT                            | RT-qPCR                                                |
| 18S rRNA, rev             | CGAACCTCCGACTTTCGTTCT                            | RT-qPCR                                                |
| HOTAIR, for               | TGGCCAAGCACCTCTATCTC                             | RT-qPCR                                                |
| HOTAIR, rev               | TTAATTAGCGCCTCCCAGTC                             | RT-qPCR                                                |
| Air, for                  | ACTTTGACAGAACAATCGGCTCAG                         | RT-PCR                                                 |
| Air, rev                  | GAACATTTGCAAAGGACAGTCGAG                         | RT-PCR                                                 |
| m7SK, for                 | ATTGATCGCCAGGGTTGATT                             | RT-qPCR                                                |
| m7SK, rev                 | CGGGGAAGGTCGTCCTCTTC                             | RT-qPCR                                                |
| mGAPDH, for               | GCGGGGCAATCTCAGCTCCC                             | RT-qPCR                                                |
| mGAPDH, rev               | GCACCCGTAAAGCCGCGAGT                             | RT-qPCR                                                |
| T7/IGS16, for             | TAATACGACTCACTATAGGG<br>AGCATGTAGCAGTTGTAGGAC    | In vitro synthesis of IGS <sub>16</sub> RNA            |
| IGS16, for                | AGCATGTAGCAGTTGTAGGAC                            | PCR, qPCR                                              |
| IGS16, rev                | TGGAGAGATGGCTCATCGGTT                            | In vitro synthesis of IGS <sub>16</sub> RNA, PCR, qPCR |
| PAPAS -21/-51 WT          | AGGAACAGAUAGAAAAGAUCACAAGCAUAAAA                 | Competitive pulldown                                   |
| PAPAS -21/-51 A/U         | AGGUUCAGAUAGUUUUGUUCUCUUGCUUUUUU                 | Competitive pulldown                                   |

|                                    |                                                                                                                                                                            |                                            |
|------------------------------------|----------------------------------------------------------------------------------------------------------------------------------------------------------------------------|--------------------------------------------|
| A-rich RNA                         | GGGGAGGAAAAAAGAAAAAAAAAAAAAAAAAGAU                                                                                                                                         | Competitive pulldown                       |
| GC-rich RNA                        | GGGAGACUCACUCCACCCCUUCUUC                                                                                                                                                  | Competitive pulldown                       |
| PAPAS En3-TFR RNA<br>#1: -275/-336 | GAGGGCUUCUGGAGGAAAAAAGAAAAAAAAA<br>AAAAAAGAUCCAAAGCUCCAGCUGACCGGGC                                                                                                         | Genomic and PCR DNA captures & competition |
| PAPAS RNA<br>#2: +5/-55            | CAGUUACCUAUCUCCAGGUCCAAUAGGAACAGA<br>UAGAAAAGAUCACAAGCAUAAAAGAGA                                                                                                           | Genomic DNA capture                        |
| PAPAS RNA<br>-234/-333             | CUCGGCCUCAGACGUACAGGGCCCCCGGUGA<br>CAGGGACAGAGAGGGCUUCUGGAGGAAAAA<br>AGAAAAAAAAAAAAAAAAAGAUCCAAAGCUCC<br>AGCUGACCG                                                         | EMSA                                       |
| PAPAS RNA<br>-182/-333             | GAACUGAUAAAGACCGACAGGUCAAUGAAAG<br>AAAACCGCGCCCAUAGCUUUCUCCUGGGCCUC<br>AGACGUACAGGGCCCCCGGUGACAGGGACAG<br>AGAGGGCUUCUGGAGGAAAAAAGAAAAAAAAA<br>AAAAAAGAUCCAAAGCUCCAGCUGACCG | EMSA                                       |
| IGS16 RNA                          | AGCAUGUAGCAGUUGUAGGACACACUAGAC<br>GAGAGCACCAGAUCUCAUUGUGGGUGGUUG<br>UGAACCAACCACCAUGUGGUUGCCUGGGAU<br>UUGAACUCAGGAUCUUCAGAAGACGAGUCA<br>GGGCUCUAAACCGAUGAGCCAUCUCUCCA      | EMSA,<br>competition                       |
| rDNA -321/-277, sense              | GCTTTGGATCTTTTTTTTTTTTTCTTTTTTCCTC<br>CAGAAGCCC                                                                                                                            | EMSA                                       |
| rDNA -321/-277,<br>antisense       | GGGCTTCTGGAGGAAAAAAGAAAAAAAAAAAAA<br>AAAGATCCAAAGC                                                                                                                         | EMSA, 5'-labeled oligo                     |

**Supplemental Table S2. List of template oligonucleotides used for in vitro transcription of PAPAS**

Bold italicized nucleotides denote the mutated regions.

|                        |                                                                                                                                                                                                                                                                            |
|------------------------|----------------------------------------------------------------------------------------------------------------------------------------------------------------------------------------------------------------------------------------------------------------------------|
| PAPAS T7/-275/-336     | GCCCGGTCAGCTGGAGCTTTGGATCTTTTTTTTTTTTTTTTTCTTTTTTCTCCAGAA<br>GCCCTCCCTATAGTGAGTCGTATTA                                                                                                                                                                                     |
| PAPAS T7/+5/-55        | TCTCTTTTATGCTTGTGATCTTTTCTATCTGTTCCCTATTGGACCTGGAGATAGGTA<br>ACTGCCTATAGTGAGTCGTATTA                                                                                                                                                                                       |
| T7 oligo, for          | TAATACGACTCACTATAGGGAG                                                                                                                                                                                                                                                     |
| PAPAS WT<br>(-1/-205)  | TAATACGACTCACTATAGGGAGACCTATCTCCAGGTCCAATAGGAACAGATAG<br>AAAAGATCACAAGCATAAAAAGAGACAGGGAGGAAAGTGACAGGCCACAGAGA<br>ATACCTGGAAGTCATACCTGGGGAGGTGGCCCAAAAATGACCCCAT AACGAAA<br>AGAACCGGACCTCAAAGGAACA ACTGGTTCGACCTGACAACCCGGGAGAACTGAT<br>AAGACCGACAGGTCAA                   |
| PAPAS<br>-60 Mut       | TAATACGACTCACTATAGGGAGACCTATCTCCAGGTCCAATAGGAACAGATAG<br>AAAAGATCACAAGCATAAAAAGAGACA <b>AAA</b> AGGAAAGTGACAGGCCACAGAGA<br>ATACCTGGAAGTCATACCTGGGGAGGTGGCCCAAAAATGACCCCAT AACGAAA<br>AGAACCGGACCTCAAAGGAACA ACTGGTTCGACCTGACAACCCGGGAGAACTGAT<br>AAGACCGACAGGTCAA          |
| PAPAS<br>-125 Mut      | TAATACGACTCACTATAGGGAGACCTATCTCCAGGTCCAATAGGAACAGATAG<br>AAAAGATCACAAGCATAAAAAGAGACAGGGAGGAAAGTGACAGGCCACAGAGA<br>ATACCTGGAAGTCATACCTGGGGAGGTGGCCCAAAAATGAC <b>TTT</b> TATAACGAAA<br>AGAACCGGACCTCAAAGGAACA ACTGGTTCGACCTGACAACCCGGGAGAACTGAT<br>AAGACCGACAGGTCAA          |
| PAPAS<br>-60/-125 dMut | TAATACGACTCACTATAGGGAGACCTATCTCCAGGTCCAATAGGAACAGATAG<br>AAAAGATCACAAGCATAAAAAGAGACA <b>AAA</b> AGGAAAGTGACAGGCCACAGAGA<br>ATACCTGGAAGTCATACCTGGGGAGGTGGCCCAAAAATGAC <b>TTT</b> TATAACGAAA<br>AGAACCGGACCTCAAAGGAACA ACTGGTTCGACCTGACAACCCGGGAGAACTGAT<br>AAGACCGACAGGTCAA |
| PAPAS<br>-72 Mut       | TAATACGACTCACTATAGGGAGACCTATCTCCAGGTCCAATAGGAACAGATAG<br>AAAAGATCACAAGCATAAAAAGAGACAGGGAGGAAAGTGACAC <b>ACACA</b> AGAGA<br>ATACCTGGAAGTCATACCTGGGGAGGTGGCCCAAAAATGACCCCAT AACGAAA<br>AGAACCGGACCTCAAAGGAACA ACTGGTTCGACCTGACAACCCGGGAGAACTGAT<br>AAGACCGACAGGTCAA          |
| PAPAS<br>-109 Mut      | TAATACGACTCACTATAGGGAGACCTATCTCCAGGTCCAATAGGAACAGATAG<br>AAAAGATCACAAGCATAAAAAGAGACAGGGAGGAAAGTGACAGGCCACAGAGA<br>ATACCTGGAAGTCATACCTGGGGAG <b>TGTGTG</b> CAAAAATGACCCCAT AACGAAA<br>AGAACCGGACCTCAAAGGAACA ACTGGTTCGACCTGACAACCCGGGAGAACTGAT<br>AAGACCGACAGGTCAA          |

|                        |                                                                                                                                                                                                                                                                           |
|------------------------|---------------------------------------------------------------------------------------------------------------------------------------------------------------------------------------------------------------------------------------------------------------------------|
| PAPAS<br>-72/-109 dMut | TAATACGACTCACTATAGGGAGACCTATCTCCAGGTCCAATAGGAACAGATAG<br>AAAAGATCACAAGCATAAAAAGAGACAGGGAGGAAAGTGACAC <b>CACA</b> AAGAGA<br>ATACCTGGAAGTCATACCTGGGGAG <b>TGTGTG</b> CAAAAATGACCCCATAACGAAA<br>AGAACCGGACCTCAAAGGAACAACCTGGTCGACCTGACAACCCGGGAGAACTGAT<br>AAGACCGACAGGTCAA  |
| PAPAS<br>-87 Mut       | TAATACGACTCACTATAGGGAGACCTATCTCCAGGTCCAATAGGAACAGATAG<br>AAAAGATCACAAGCATAAAAAGAGACAGGGAGGAAAGTGACAGGCCACAGAGA<br>ATAC <b>CACA</b> AAGTCATACCTGGGGAGGTGGCCCAAAAATGACCCCATAACGAAA<br>AGAACCGGACCTCAAAGGAACAACCTGGTCGACCTGACAACCCGGGAGAACTGAT<br>AAGACCGACAGGTCAA           |
| PAPAS<br>-87/-101 dMut | TAATACGACTCACTATAGGGAGACCTATCTCCAGGTCCAATAGGAACAGATAG<br>AAAAGATCACAAGCATAAAAAGAGACAGGGAGGAAAGTGACAGGCCACAGAGA<br>ATAC <b>CACA</b> AAGTCATAC <b>GTTGTG</b> GAGGTGGCCCAAAAATGACCCCATAACGAAA<br>AGAACCGGACCTCAAAGGAACAACCTGGTCGACCTGACAACCCGGGAGAACTGAT<br>AAGACCGACAGGTCAA |
